1 Comparisons of Auditory Steady State and Auditory Brainstem Response  
2 Thresholds in Infants with Normal Hearing and Conductive Hearing Loss

3  
4 Hope Valeriotte<sup>1,2,3</sup> and Susan A. Small<sup>3</sup>

5  
6 <sup>1</sup>Audiology Services, Glenrose Rehabilitation Hospital, Edmonton, AB Canada

7  
8 <sup>2</sup>Early Hearing Detection and Intervention Program, Alberta Health Services, AB Canada

9  
10 <sup>3</sup>School of Audiology and Speech Sciences, The University of British Columbia, Vancouver, BC  
11 Canada

12  
13 \*Address for correspondence:

14 Hope Valeriotte

15 Audiology Services, Glenrose Rehabilitation Hospital

16 10230 111 Ave, Edmonton, AB

17 Phone: (780) 735-6019

18 FAX: (780) 735-6013

19 email: hope.valeriotte@ahs.ca

20  
21 This research was supported by a Discovery Grant from the Natural Sciences and Engineering  
22 Research Council of Canada to Dr. Susan Small. Ethics approval for this project was obtained  
23 from the University of British Columbia's Clinical Research Ethics Board (certificate # H13-  
24 02445) and the University of Saskatchewan's Biomedical Research Ethics Board (certificate #  
25 13-319).

26  
27 Preliminary findings were presented in 2015 at Biennial Symposium of the International Evoked  
28 Response Audiometry Study Group IERASG: Valeriotte, H., & Small, S. A. (2015). Comparison  
29 of air- and bone-conduction auditory brainstem and multiple 80-Hz auditory steady-state  
30 responses in infants with normal hearing and conductive hearing loss. Abstracts of the XXIV  
31 Biennial Symposium of the International Evoked Response Audiometry Study Group IERASG  
32 (May 10–14; Busan, Korea). Retrieved April 4, 2015, from <http://www.ierasg2015.org>

33  
34 Acknowledgements

35  
36 Dr. Susan Small was supervisor and mentor for the first author's M.Sc. thesis research. Sadly, Dr.  
37 Small passed away in 2022. Thanks to Dr. Charlotte Douglas for her assistance in obtaining  
38 ethics approval, recruitment of participants and supervision of data collection; Drs. Robert  
39 Burkard and David Stapells for their mentorship in the preparation of this manuscript, and Alex  
40 Gascon for his assistance with data analysis.

1 **ABSTRACT**

2  
3 This study investigates how well the air- and bone-conduction auditory steady-state response  
4 detects mild conductive hearing loss compared to the auditory brainstem response in young  
5 infants. Air-bone gap sizes are compared between infants with normal hearing and conductive  
6 loss using a two-group cross-sectional design. Twenty-three (500 Hz) and 22 (2000 Hz) infants  
7 (0-6 months of age) with normal hearing and 15 (500 Hz) infants with conductive loss were  
8 recruited from newborn hearing screening. Thresholds were obtained to frequency-specific air-  
9 and bone-conducted stimuli. There were no instances of conductive loss at 2000 Hz. 500 Hz  
10 mean thresholds and air-bone gap sizes were compared. Sensitivity and specificity for  
11 identifying conductive loss were measured. Overall, mean bone-conduction thresholds were  
12 similar between groups, and mean 500-Hz air conduction thresholds were higher with larger air-  
13 bone gap size for infants with conductive loss. Sensitivity and specificity for identifying  
14 conductive loss was highest for air-conduction auditory brainstem response threshold  
15 measurement compared to screening and auditory steady-state response threshold measurements.  
16 Compared to the auditory brainstem response, the variability of auditory steady-state response  
17 thresholds and air-bone gap size was too great to reliably separate normal hearing from mild  
18 conductive loss. More research is needed using infants with varying degrees of hearing loss at  
19 multiple frequencies to fully assess the appropriateness of the auditory steady-state response as a  
20 clinical diagnostic tool for an infant population.

21  
22 **Keywords :** Auditory Brainstem Response (ABR), Auditory Steady-State Response (ASSR), Air-  
23 conduction, Bone-conduction, Air-bone gap

24  
25  
26  
27

1 Comparisons of Auditory Steady State and Auditory Brainstem Response Thresholds in Infants  
2 with Normal Hearing and Conductive Hearing Loss

3  
4 Early hearing detection and intervention (EHDI) programs continue to be implemented  
5 internationally and are a major driving force for current research on infant hearing. Within this  
6 context, finding more efficient, less time-consuming methods of evaluating hearing in young  
7 infants has been of interest with some looking for alternatives to the current diagnostic gold-  
8 standard method, the auditory brainstem response (ABR), to integrate in their programs. For  
9 decades, the ABR has been the proven and reliable method that major EHDI programs (Bagatto,  
10 2020; Hatton, Van Maanen & Stapells, 2022; JCIH, 2019) rely on to identify hearing loss in the  
11 infant population. Like behavioural methods of auditory assessment, ABR thresholds can be  
12 obtained using both air- and bone-conducted stimuli (Stapells & Ruben, 1989; Yang et al., 1987,  
13 1993). Bone-conduction (BC) ABR assessment of infant hearing is required to differentiate  
14 between conductive and sensorineural hearing losses when air-conduction (AC) thresholds are  
15 elevated (Hatton et al., 2012). When conductive hearing loss (CHL) is present, an air-bone gap  
16 can be seen between elevated AC and normal BC thresholds.

17 Previous research to assess optimal testing conditions, including bone oscillator  
18 placement on the infant head and coupling method (i.e., handheld vs. band) and force, have  
19 informed clinical best practice in assessing BC thresholds in this young population who is unable  
20 to respond behaviourally (Small et al., 2007; Yang et al., 1991). The ASSR is another auditory  
21 evoked potential that is of interest to clinicians and researchers as an alternative to ABR because  
22 it also assesses hearing using both AC and BC stimuli, with the added benefit of testing multiple  
23 frequencies and ears simultaneously. The decision to use the ASSR as a method to assess infant  
24 hearing requires clear demonstration that the ASSR is comparable (or superior) to current gold-

1 standards in its ability to assess infant AC and BC frequency-specific hearing thresholds in an  
2 accurate and precise way. An EHDI program requires high sensitivity to detect hearing loss in its  
3 target population and high specificity in differentiating elevated from normal hearing levels.  
4 Comparisons are needed between the ASSR and current gold-standard methods that take into  
5 account the participants' age (i.e., behavioural audiometry as the gold standard for infants >6  
6 months and ABR for infants  $\leq$ 6 months (Gorga et al., 2006; JCIH, 2019; Widen et al., 2005).  
7 AC and BC modes of presentation, and hearing presentations from normal hearing ability to all  
8 degrees of sensorineural, conductive and mixed hearing loss. Maturation changes in BC ASSR  
9 responses and infant/adult differences in skull properties are discussed in Small & Stapells  
10 (2008a). Given these differences, it is important to understand how the BC ASSR behaves in  
11 infants with hearing loss. External ear canal changes and maturation for AC are understood and  
12 can be measured, but maturation effects for these infants are not as well documented for BC  
13 results. Understanding this is relevant to the use of ASSR/ABR in the clinical setting.

14 A review of the literature shows that many of these comparisons have been investigated  
15 and published over the last few decades and comparisons between ASSR and behavioural  
16 thresholds to date have been encouraging. For example, several studies have shown that AC and  
17 BC ASSR and behavioural thresholds in infants with normal hearing (NH) (Casey & Small,  
18 2014; Luts et al., 2006) and infants with hearing loss (Aimoni et al., 2018) correlate highly. One  
19 study with a small number of participants also suggests the BC ASSR is able to identify normal  
20 cochlear sensitivity in young children with conductive hearing loss (Nagashima et al., 2013).

21 It is known that there are differences in BC ASSR thresholds by age likely due to skull  
22 maturation (discussed in detail in Casey & Small, 2014 and Small & Stapells, 2008a); however,  
23 the ASSR introduces other possible factors to consider, such as the use of high stimulus rates and

1 multiple stimuli, that may have an effect on ASSR thresholds that does not apply to the ABR. It  
2 is especially important to establish a comprehensive body of literature for infants who are too  
3 young to respond behaviourally and who define the target population for EHDI programs.  
4 Studies comparing AC ASSR thresholds to the tone-ABR (using varied stimulus parameters and  
5 test protocols) thus far have shown that AC ASSR thresholds (in dB HL) in infants with NH and  
6 with hearing loss are consistently poorer than AC ABR thresholds (in dB nHL) but are highly  
7 correlated and accurate (Michel & Jørgensen, 2017; Rance et al., 2006; Rance & Rickards, 2002;  
8 Rodrigues et al., 2010; Van Maanen & Stapells, 2009, 2010). More recently, however, at least  
9 one other study using different collection protocols and stimulus parameters have suggested the  
10 reverse, with thresholds (in dB eHL) for ABR being poorer than for ASSR (Sininger et al., 2018)  
11 This latter study, however, used larger correction factors for ASSR compared to ABR, which  
12 may explain this finding. More studies with infants with hearing loss are needed, but the existing  
13 AC ASSR data appear promising. Studies that compare frequency-specific BC toneburst-ABR  
14 thresholds with sinusoidal amplitude modulated (SAM) tone ASSR thresholds in young infants  
15 with NH and hearing loss are significantly lacking, thus this is the focus on the present study.  
16 Small & Stapells (2008a) published BC ASSR normative data proposing a set of “normal” or  
17 minimum ASSR intensities, among others, for infants 0-11 months but did not compare  
18 frequency specific BC ASSR to BC ABR. Swanepoel et al. (2008) did provide some BC ASSR  
19 data for infants with hearing loss, but did not compare these results to toneburst ABR results and  
20 tested a broad age range (0.25-11.5 years of age). To our knowledge, no data comparing BC  
21 ASSR to BC ABR thresholds in young infants with hearing loss exist in the form of peer-  
22 reviewed publications.

1 For the present study, AC and BC ABR and ASSR thresholds in NH infants and infants  
2 with CHL confirmed by the gold-standard ABR thresholds were compared to investigate the  
3 following questions:

- 4 (1) What are ABR and ASSR thresholds in young infants with NH and CHL?  
5 (2) How does the air-bone gap (ABG) compare between ABR and ASSR in young  
6 infants with NH and CHL?  
7 (3) What are appropriate minimum intensity cutoffs to differentiate NH from CHL using  
8 AC and BC ASSR in young infants?  
9 (4) Does the ASSR detect CHL as well as the ABR in young infants?

10

11

## **Methods**

12 Stimulus and recording setups for ABR followed those described in the BCEHP ABR protocol  
13 (Hatton et al., 2022). Stimulus and recording setups for ASSR were similar to those described in  
14 Casey & Small (2014), with minor differences between the research and clinical versions of the  
15 MASTER software. Details of methodology for ABR and ASSR are provided below.

## **Participants**

17 Infants were recruited through the newborn hearing screening program at the Royal  
18 University Hospital, Saskatoon. Participants were recruited if they failed newborn hearing  
19 screening or if they were unable to be screened at birth. Participation was entirely voluntary.  
20 Sixty four infants between the ages of 0 and 6 months participated (NH mean age = 7.36 weeks,  
21 range 0.6-12.9 weeks, CHL mean age = 6.71 weeks, range 2.9-20.6 weeks); 61 from the well-  
22 baby nursery and 3 graduates from the neonatal intensive care unit (NICU), none of whom

1 presented with congenital aural atresia or microtia. Fourteen infants were excluded because they  
2 did not sleep and did not complete any conditions of the testing session.

3       Each frequency (500 and 2000 Hz) was assessed individually and was categorized as a  
4 normal hearing or conductive hearing loss threshold based on the relationship between the AC  
5 and BC ABR results. In other words, if AC ABR was within normal limits at a specific  
6 frequency, that frequency's threshold was placed in the normal hearing group. If AC ABR was  
7 elevated with normal BC ABR results at the same frequency, the frequency's threshold was  
8 placed in the conductive hearing loss group. Normal versus elevated levels correspond to those  
9 specified in the British Columbia Early Hearing Program (BCEHP) protocols. The BCEHP  
10 minimum stimulus intensities for 500 Hz are AC: 35 dB nHL BC: 20 dB nHL and for 2000 Hz  
11 are AC: 30 dB nHL and BC: 30 dB nHL (Hatton et al., 2022).

12       Results were included in the analysis whether partial or complete conditions were  
13 obtained. Infants who did not complete any portion of the protocol due to inability to sleep were  
14 excluded.

15       To verify the status of the middle ear and hearing at the time of testing, 1000 Hz  
16 tympanometry and transient-evoked otoacoustic emissions (TEOAEs) were performed using a  
17 Madsen AccuScreen and the OTOflex. The primary purpose of the screening measures was to  
18 corroborate the presence of middle ear pathology when participants were identified with CHL  
19 shown by abnormal tympanograms and absent TEOAEs and to determine the follow-up protocol  
20 as per the Royal University Hospital guidelines. The cross-check principle has been used in  
21 pediatric audiology for decades. As Hall (2016) describes, "no auditory test result should be  
22 accepted and used in the diagnosis of hearing loss until it is confirmed or crosschecked by one or  
23 more independent measures." TEOAE stimulus levels ranged from 70-84 dB SPL and used

1 noise-weighted averaging. The response detection method involved the counting of significant  
2 signal peaks with self-calibration depending on ear canal volume. To pass the TEOAE test, a  
3 total of eight valid peaks in alternating directions (counted both above and below the median  
4 line) must be present. Of the 50 participants who completed the testing, 31 did not pass  
5 tympanometry and 31 did not pass OAEs. A tympanogram was considered to be a “refer” if there  
6 was no identifiable peak, or maximum admittance was less than or equal to 0.6 mmho  
7 compensated from the negative tail at -400 daPa, and thus, the tympanogram was considered flat  
8 (type B). Type B tympanograms (Jerger, 1970) show minimal or no mobility of the tympanic  
9 membrane supportive of otitis media with effusion (OME) and is considered to be abnormal  
10 tympanometric pattern. TEOAEs were considered to be a “refer” if there was a response in fewer  
11 than three bands. Data collection took place in the context of a single audiology visit per  
12 participant, and the results of any medical and/or audiological follow-up is unknown.

### 13 **Stimuli**

14 AC stimuli were presented to participants using an ER-3A insert earphones in one ear  
15 (the same ear that was used to establish BC thresholds). BC stimuli were presented to  
16 participants using the B-71 bone oscillator placed on the mastoid, slightly posterior to the upper  
17 portion of the pinna for both ABR and ASSR testing. Small et al. (2007) showed no difference  
18 between lower and upper mastoid bone oscillator placement, so the upper portion was chosen to  
19 avoid interfering with the nearby mastoid electrode. This was coupled to the head with  
20 approximately 400 grams of force using the hand-held method (i.e., held by the first author).  
21 This coupling method was used as it was the least disruptive method to the infants’ sleep and  
22 was found to have no significant differences to thresholds obtained by the elastic headband  
23 coupling method (Small et al, 2007). The examiner was trained to apply 400 grams of force (425



1 ± 25 g) by practicing BC application on a compressive spring scale, pressing down on the  
2 transducer with one or two fingers until the desired force was achieved with feedback. Once  
3 trials were completed with feedback, additional trials were completed without feedback, in a  
4 method similar to Small et al. (2007). Once it was determined that examiner was adequately  
5 trained, data collection began. Force was not verified on the infant head during testing. For ABR  
6 testing, the Intelligent Hearing Systems (IHS) SmartEP was used to generate and present stimuli.  
7 BCEHP-specified stimuli were used for both 500 and 2000 Hz (Hatton, Van Maanen, & Stapells,  
8 2022). These stimuli were exact-Blackman-windowed tones (five-cycle total duration, no  
9 plateau) and presented at a rate of 39.1/sec to one ear (Hatton et al., 2019, 2022; Janssen et al.,  
10 2010). For ASSR testing, the two-channel Master II Clinical System was used to generate and  
11 present ASSR stimuli with carrier frequencies 500, 1000, 2000 and 4000 Hz. These stimuli were  
12 AM<sup>2</sup> at modulation frequencies 78, 85, 93 and 101 Hz for carrier frequencies 500, 1000, 2000  
13 and 4000 Hz, respectively, and were presented simultaneously to one ear (“monotic multiple,  
14 MM” ASSR).

## 15 **Calibration**

### 16 ***ABR Stimuli***

17 AC stimuli were calibrated in dB nHL using ppeSPL with a Quest 177 sound level meter  
18 and G.R.A.S. DB 0138 2-CC coupler with 1-inch microphone. The acoustic calibrations for 0 dB  
19 nHL for AC using insert earphones, were 22 and 20 dB ppe SPL for 500 Hz and 2000 Hz,  
20 respectively. BC stimuli were calibrated using the B & K 4930 artificial mastoid, where the  
21 acoustic calibration for 0 dB nHL for BC using the B-71 bone oscillator were 67 and 49 dB re:  
22 1µN ppe at 500 and 2000 Hz, respectively [see Stapells & Small (2017), British Columbia Early

1 Hearing Program (Hatton, Van Maanen, & Stapells, 2022) or Ontario Infant Hearing Program  
2 (Bagatto, 2020) protocols for Canadian ppeRETSPLs and ppeRETFLs].

### 3 ***ASSR Stimuli***

4 AC ASSR stimuli were calibrated in ppe SPL using the dB SPL RETSPLs as per ANSI  
5 (1996) using a Quest 177 sound level meter and G.R.A.S. DB 0138 2-CC coupler with 1-inch  
6 microphone. Each of the four frequencies were calibrated separately in dB HL and then  
7 combined. Calibrations for 0 dB HL for AC using insert earphones was 5.5 and 3 dB SPL for  
8 500 Hz and 2000 Hz, respectively (ANSI, 1996). BC stimuli were similarly calibrated using  
9 (ANSI, 1996) RETFLs with the Quest 177 sound level meter and B & K Mastoid 4930 artificial  
10 mastoid. Calibrations for 0 dB HL were 58 and 31 dB re: 1 $\mu$ N for BC at 500 and 2000 Hz,  
11 respectively.

### 12 **Recording**

13 All participants were tested at the Royal University Hospital, Saskatoon in a double-  
14 walled sound-attenuating booth. All recordings were obtained using the Intelligent Hearing  
15 Systems SmartEP ABR system and the Master II Natus/Biologic clinical ASSR System. Four  
16 disposable electrodes were placed on the infant's scalp using the typical electrode montage for  
17 infant ABR testing: one (non-inverting) electrode on the vertex, an (inverting) electrode on each  
18 mastoid and the common electrode off-center on the forehead. Impedance for each electrode was  
19 less than 3 kOhms.

20 For ABR testing, standard BCEHP parameters were used at the time of data collection.  
21 Gain was set to 100,000 and band-pass filtering from 30 to 1500 Hz with an artifact rejection of  
22  $\pm 25$   $\mu$ V. One channel was recorded for AC ABR conditions and two channels were recorded  
23 (i.e., the ipsilateral and contralateral montages) for BC ABR conditions. A minimum of two

1 replications of 2000 trials each was obtained at threshold levels and one step (of 10 dB) below  
2 threshold. The presence and/or absence of a response were determined visually and by objective  
3 measures (signal to noise ratio and residual noise) and was interpreted by the first author. A  
4 response being “present” was determined by a visually identifiable wave V in the averaged  
5 waveform in the ipsilateral channel recording for AC ABR and by an ipsilaterally dominant  
6 wave V response for BC ABR when ipsilateral and contralateral recordings were compared  
7 (Hatton et al., 2022). In accordance with BCEHP guidelines, “no response” was determined only  
8 when no visually identifiable wave V was present and SmartEP residual noise was less than or  
9 equal to 0.08  $\mu$ V (Hatton, Van Maanen, & Stapells, 2022). For ABR measures, where a response  
10 was identified, RN and SNR measures were used to support visual interpretation where possible,  
11 but ultimately visual identification of a response was considered sufficient to determine  
12 “response present”. “No response” judgements were made on the basis of both visual  
13 interpretation but also with IHS-SmartEP SNR values  $<1$  and  $RN \leq 0.08\mu V$ . The participants  
14 were classified as having CHL at a frequency by demonstrating elevated AC ABR results with  
15 normal BC ABR results (based on BCEHP levels) with abnormal tympanometry findings. In the  
16 classification of participants, tympanometry and OAE screening was used only as a cross-check  
17 to confirm CHL where identified at a specific frequency to provide additional evidence in the  
18 identification of CHL. The NH group did not have a specific criterion for tympanometry or OAE  
19 screening result and that categorization was made on the basis of present ABR to AC and BC  
20 stimuli at minimum normal levels at that frequency (Hatton et al., 2022). To ensure the validity  
21 in this method of categorization, an independent samples t-test was performed comparing AC  
22 ABR and ASSR NH thresholds in infants with normal OAE screening results and abnormal OAE  
23 screening results for 500 Hz and 2000 Hz separately and was not significant. This supports the

1 validity of this method of categorization. Where the typical clinical protocol used in BCEHP  
2 does not include testing down to threshold if a present response has been established at the  
3 minimum stimulus intensity, testing down to threshold for all measures completed (AC and BC  
4 ABR and ASSR) did take place in this study.

5 For ASSR testing, two-channels were recorded but only the ipsilateral channel (i.e., vertex-  
6 ipsilateral mastoid) was examined when determining response presence or absence and was the  
7 only channel analyzed in this study. For ASSR measures, no visual identification was required,  
8 as only SNR (p value) and residual noise were used to make response/no-response  
9 determinations. Masking was not used as the interaural attenuation for infants reported by Small  
10 & Stapells (2008b) is at least 10-30 dB. The EEG was filtered using a 30-150 Hz filter and  
11 amplified 10 000 times with artifact rejection set to  $\pm 125 \mu\text{V}$ . The analog-to-digital conversion  
12 rate was 1200 Hz. Each sweep consisted of 16 epochs of 1024 data points and took 13.107  
13 seconds of recording time. The ASSRs were averaged in the time domain and analyzed online in  
14 the frequency domain using a fast Fourier transform (FFT) with a resolution of 0.076 Hz over a  
15 range of 0-625 Hz. Amplitudes were measured baseline-to-peak and expressed in nV. Recording  
16 continued until there was a response present with a minimum of 10 sweeps, or the residual noise  
17 levels were at least  $<15 \text{ nV}$  and there was a minimum of 10 sweeps completed; whichever came  
18 first. A F-ratio was calculated by the MASTER II system and a response was considered present  
19 if a significant response value ( $p < 0.05$ ), was obtained from the F-ratio compared to critical  
20 values for  $F(2, 240)$  for at least three consecutive sweeps. The F-ratio estimated the probability  
21 that the amplitude of the ASSR at the modulation frequency was significantly different from the  
22 average amplitude of the noise at adjacent frequencies. This was calculated within 120 bins, or  
23  $\pm 60$  bins from the modulation frequency (John & Picton, 2000). A response was considered

1 absent if no significant response value was obtained ( $p > 0.05$ ) and the noise value was  
2 appropriately low ( $< 15$  nV).

### 3 **Procedure**

4 One session lasting between one and three hours took place for each subject. Before  
5 testing began, caregivers consented to participation in the study and were provided a small  
6 honorarium. All infants completed a hearing screening (tympanometry and transient evoked  
7 otoacoustic emissions [TEOAEs]), ABR and ASSR testing in the recording session. One ear was  
8 chosen to be tested using electrophysiologic methods. The selection of test ear was made based  
9 on the outcome of the hearing screening. If only one ear failed, that ear was tested using ABR  
10 and ASSR; if both ears failed, or both ears passed, the ear was chosen based on the most  
11 comfortable position for the infant and the caregiver. Testing was completed with the examiner  
12 inside the booth, next to the infant and caregiver. The examiner held the oscillator and  
13 continually monitored the placement of the earphone in the infant's ear.

14 Hearing screening using TEOAEs and 1000 Hz tympanometry was conducted and  
15 electrodes were applied while the infant was awake. The infant was given the opportunity to fall  
16 asleep before ABR and ASSR testing began and remained asleep during these tests in the  
17 caregiver's arms during ABR and ASSR testing. If the infant woke during the session, an  
18 opportunity for them to fall back of sleep was given before testing continued.

19 Electrophysiological testing always began with ABR in order to provide parents with  
20 information from a "gold-standard" test before proceeding with ASSR. AC ABR was followed  
21 by BC ABR.

22 ABR testing began at BCEHP minimum stimulus intensities that correspond to the upper  
23 limit of normal hearing. For AC ABR, testing began at 35 dB nHL and 30 dB nHL for 500 Hz

1 and 2000 Hz, respectively. BC ABR testing began at 20 dB nHL and 30 dB nHL for 500 and  
2 2000 Hz, respectively. No masking was used given the age group of the participants and large  
3 interaural attenuation. A 10-dB bracketing method was used. Threshold levels were defined as  
4 the lowest level at which a response is present with an absent response 10 dB below. The lowest  
5 level tested was 0 dB nHL for 2000 Hz AC and BC and 500 Hz BC, and 5 dB nHL for 500 Hz  
6 AC due to starting levels and 10 dB step sizes.

7         ASSR testing began at 30 dB HL, corresponding to the highest “minimum level”  
8 obtained by Casey & Small (2014). Similar to the ABR testing procedure, a 10-dB bracketing  
9 method was used, and threshold was defined as the lowest level at which a response is present  
10 with an absent response 10 dB below. The lowest level tested was 0 dB HL for ASSR. As the  
11 study was more interested in BC comparisons, BC ASSR was prioritized over AC and was  
12 completed first. Thresholds were found using a 10-dB bracketing procedure. If a response was  
13 present, intensity was decreased by 10 dB. If no response was present, intensity was increased by  
14 20 dB. Testing continued down to threshold.

15         In the sections to follow, only 500-Hz data for NH and CHL groups will be discussed.  
16 Although 2000-Hz data were collected (shown in Table 2), as there were no instances of CHL  
17 observed at 2000 Hz, these data are only briefly addressed in the remainder of this article.

18

## 19 **Data Analyses**

### 20 *AC and BC ABR and ASSR Thresholds*

21         Measures of central tendency and dispersion are provided for each frequency condition  
22 (500 & 2000 Hz) by group (NH, CHL). Independent samples t-tests were performed to compare  
23 500 Hz AC and BC ABR and ASSR thresholds between NH and CHL groups.

1 ***Air-Bone Gaps***

2 Air-bone gap (ABG) between ABR and ASSR in infants with NH and CHL were  
3 compared. Air-bone gaps (ABG) were calculated for ABR by subtracting the BC (nHL)  
4 threshold from AC (nHL) threshold for each subject. ASSR ABGs were calculated by  
5 subtracting the BC (dB HL) threshold from the AC (dB HL) threshold. For 500 Hz, an  
6 independent samples t-test was then conducted to determine if means between groups were  
7 significantly different. Differences in thresholds were considered significant at the  $p < 0.05$  level.

8 ***Minimum ‘Normal’ Intensities***

9 Individual and mean AC and BC ABR and ASSR thresholds were determined for NH  
10 (500 and 2000 Hz) and CHL (500 Hz) groups. “Minimum normal intensities” represent the  
11 minimum test intensity a response would need to be present in a clinical setting to confirm  
12 normal hearing. Minimum intensities were determined by calculating the cumulative percent of  
13 responses present at each stimulus level for each testing method and mode of presentation. The  
14 intensity at which greater than 90 percent of normal-hearing infants had a response was  
15 considered the “minimum intensity” (e.g., Van Maanen & Stapells, 2009; Small & Stapells,  
16 2008a). Ninety percent was chosen to represent a intensity that separates “normal” from  
17 “elevated” well according to the gold-standard threshold measure, ABR. The intensities for BC  
18 ABR have been assessed by Hatton et al. (2012).

19 ***Sensitivity and Specificity for Conductive Hearing Loss Detection with ASSR***

20 Sensitivity and specificity using ASSR was measured using the ABR as the gold standard  
21 to determine whether the ASSR detects CHL as well as the ABR. Sensitivity and specificity of  
22 the OAE/tympanometry screening, AC ASSR threshold and air-bone gap and ABR air-bone gap  
23 were also measured. These were calculated as shown in Table 1. The 500 Hz ABR and ASSR

1 thresholds were averaged separately for AC and BC, and 500 Hz thresholds were compared  
2 between normal and CHL groups. Analyses were performed using an independent samples t-  
3 tests. Differences in thresholds were considered significant at the  $p < 0.05$  level.

4 <INSERT TABLE 1 >

5

6

### **Results**

7 Mean thresholds (as well as SD and 90% levels) for both 500 and 2000 Hz ABR/ASSR  
8 AC and BC thresholds can be found in Table 2. For infants with confirmed CHL, mean AC ABR  
9 thresholds increased compared to infants with NH. Mean AC ABR and ASSR thresholds at 500  
10 Hz were larger for infants with CHL. Standard deviations were greater for ASSR thresholds  
11 compared to ABR thresholds for both AC and BC. No infants demonstrated CHL at 2000 Hz (as  
12 defined as an elevated 2000 Hz AC threshold in the presence of a 2000 Hz BC threshold within  
13 normal limits) and for this reason are not discussed in sections to follow.

14 <INSERT TABLE 2>

#### **500 Hz ABR and ASSR Thresholds for CHL and NH Groups**

16 Independent samples t-tests showed AC ABR thresholds for the CHL group were higher  
17 than thresholds for the normal-hearing group [ $t(36) = -10.95, p < 0.001$ ]. BC thresholds did not  
18 significantly differ across groups [ $t(37) = -0.67, p = 0.51$ ]. AC ASSR thresholds for the CHL  
19 group were also higher than thresholds for the NH group [ $t(34) = -2.10, p = 0.043$ ]. BC ASSR  
20 thresholds did not significantly differ across groups [ $t(36) = 0.56, p = 0.579$ ]. Levene's Test for  
21 equality of variances was not significant, so equal variances were assumed. AC ABR and ASSR  
22 and BC ASSR and ABR thresholds were not correlated [AC slope = 0.17, intercept = 26.67,  $r^2 =$   
23 0.04; BC slope = 0.15, intercept 15.35,  $r^2 = 0.01$ ].



## 1 **Air-bone Gap for CHL vs. NH Groups**

2           The air-bone gaps (ABGs) at 500 Hz for the groups with NH and CHL are shown in  
3 Table 3, Figure 1 (ABR) and Figure 2 (ASSR). On average, the mean 500-Hz ABGs for the two  
4 groups were as follows: (i) ABR NH: 15 dB, (ii) ASSR NH: 12 dB (iii) ABR CHL: 36 dB, (iv)  
5 ASSR CHL: 21 dB. Two outliers were present in the ABR ABG data set for the CHL group.  
6 The independent samples bootstrapped t-test comparing mean ABR ABG for the NH and CHL  
7 group showed significantly larger ABGs for the CHL group than in the NH group [ $t(35) = -7.74$ ,  
8  $p < 0.001$ ]. Outliers were defined as a data point that is greater than the upper quartile + 1.5x the  
9 interquartile range. A bootstrapped t-test was used to account for the outliers. Similarly, for the  
10 ASSR, the independent samples t-test showed ABGs were also significantly larger in CHL group  
11 [ $t(33) = -2.30$ ,  $p = 0.028$ ]. Levene's Test for equality of variances was not significant, so equal  
12 variances were assumed. The majority of NH participants had 500-Hz ABR ABGs 25 dB or  
13 smaller (21 of 22) and CHL subjects of 35 dB or larger (13 of 15). As shown in Figures 1 and 2,  
14 compared to ABR, there was more overlap between ASSR NH and CHL groups where the  
15 majority of NH participants had ASSR ABGs of 20 dB or smaller and CHL of 10 dB or larger.  
16 ABR and ASSR ABG size, however, were poorly correlated (slope = 0.24, intercept = 10.02,  $r^2 =$   
17 0.07). For 2000 Hz, the mean ABG for the NH group was approximately -3 and 3 dB for ASSR  
18 and ABR, respectively; the majority of NH infants had 2000-Hz ABR ABGs 10 dB or smaller  
19 (20 of 22), and 10 dB or smaller for ASSR (19 of 21).

20 <INSERT TABLE 3>

21 < INSERT FIGURE 1 >

22 < INSERT FIGURE 2>

## 23 **Minimum “Normal” Intensities**

1           The minimum intensity cutoffs for ABR and ASSR were determined for AC and BC  
2 separately by calculating the cumulative percent of responses present at each stimulus intensity  
3 for each testing method and mode of presentation. The intensity at which greater than 90 percent  
4 of NH infants had a response was considered the “minimum intensity”. For ABR, the minimum  
5 intensity levels were 30 dB nHL for 2000 Hz AC and BC, and 35 and 20 dB nHL for 500 Hz AC  
6 and BC, respectively (see Table 2). For ASSR, the minimum intensity levels were 40 dB HL for  
7 2000 Hz AC and BC and 40 and 30 dB HL for 500 Hz AC and BC, respectively. Minimum  
8 ASSR intensities (in dB HL) were found to be higher for AC compared to BC and higher for  
9 ASSR compared to the ABR minimum intensities (in dB nHL) used by the BCEHP.

#### 10 **Sensitivity and Specificity for CHL Detection**

11           Table 4 compares sensitivity and specificity for each test completed using different cutoff  
12 criteria. Sensitivity and specificity is calculated, with reference to NH or CHL diagnosis using  
13 the gold standard ABR, for: Tympanometry/OAE screening, ASSR and ABR ABG size, and AC  
14 ASSR thresholds. The subtype for each test category that had the highest specificity and a  
15 sensitivity exceeding 90% are bolded. For such a test to be used in the context of an early  
16 hearing detection and intervention program, there is very low tolerance for missing cases of  
17 hearing loss, so sensitivity must be high. For screening measures, sensitivity was high for all  
18 screening tests, while specificity was poor. For ABG, the sensitivity worsens and specificity  
19 improves as the criteria to define the minimum ABG for CHL increases. Using AC ASSR  
20 thresholds as the criterion for CHL identification, as threshold increases, sensitivity worsens  
21 while specificity improves.

22 <INSERT TABLE 4>

23

#### **Discussion**

1 **ABR vs ASSR threshold differences**

2           ABR and ASSR thresholds differed when measured in the same infant and were found to  
3 be poorly correlated in the present study (AC  $r^2 = 0.04$ ; BC  $r^2 = 0.01$ ). Given the narrow range of  
4 thresholds obtained, this is not surprising. Previous studies have shown strong correlations  
5 between ABR and ASSR thresholds, and they are thought to measure responses from  
6 approximately the same part of the auditory system (Van Maanen & Stapells, 2010; Sininger et  
7 al. 2018). For these reasons, it was expected that the ABR and ASSR thresholds would be  
8 similar. Threshold differences in the present study may be in part due to the 0 dB HL/nHL values  
9 used for ABR and ASSR, starting intensities being offset by 5 dB (i.e., ABR at 35 dB nHL and  
10 ASSR 30 dB HL), a 10-dB step size, and the rather modest AC threshold shifts due to mild CHL.  
11 If smaller step sizes, similar starting levels, and populations with greater degrees of CHL were  
12 used, this difference may have followed the trend of Rance et al. (2006) where the difference  
13 between thresholds became minimal when converted to like units. Other contributors to the  
14 ASSR-ABR differences are potentially related to an insufficiently large sample size and a  
15 difference in stimuli.

16 **Air-Bone Gaps**

17           To our knowledge, this is the first study to compare AC and BC ASSR thresholds within  
18 participants in infants with ABR-confirmed NH and CHL. ABGs for both ABR and ASSR CHL  
19 groups were larger than their NH counterparts, as expected. We had anticipated that threshold  
20 differences would be observed between ASSR and ABR thresholds because dB nHL threshold  
21 values were used for ABR (i.e., thresholds that included a consideration of temporal integration  
22 issues) whereas the dB HL values for SAM tones were based on dB HL values for long-duration  
23 tones as specified in ANSI S3.6. However, we also anticipated the differences in threshold for

1 ASSR and ABR to be similar for AC and BC stimuli, thus no impact to estimated ABGs was  
2 expected (i.e., whatever differences may be present between ABR and ASSR would affect AC  
3 and BC thresholds similarly and thus the ABG would not be greatly affected across these  
4 measures). ABR and ASSR ABGs for the NH group did not differ significantly, however CHL  
5 ABR and ASSR ABGs did differ significantly.

6 We also expected that the ABGs for ABR and ASSR would be larger in infants with CHL  
7 than with NH and this was confirmed. In clinical practice when using behavioural methods of  
8 assessment, clinicians operate under the assumption that individuals with NH and sensorineural  
9 hearing loss do not exhibit clinically significant ABGs; while those with CHL are expected to  
10 show an ABG. In adult audiometry, with test/retest reliability in behavioural audiometry of  $\pm 5$   
11 dB, an ABG  $\geq 15$  dB is often considered clinically significant and this tends to be extrapolated in  
12 clinical practice to define clinically significant ABG sizes in pediatric assessments.

13 In the clinical setting, it is challenging to assess the magnitude of the ABR and ASSR  
14 ABGs for several reasons. First, most ABR/ASSR clinical protocols do not encourage testing  
15 down to true threshold (at least, not in Canada), but rather recommend the use of “minimum  
16 normal intensities” where if a response is present, it is considered within normal limits and  
17 testing at lower presentation intensities is not required. The goal of most Canadian EHDI  
18 programs is to detect permanent congenital hearing losses  $\geq 30$  dB HL and this method of  
19 assessment accomplishes this goal in a time-effective manner. Second, ABGs for clinical use (in  
20 many provinces in Canada) are calculated on the estimated hearing levels (eHL) values for ABR  
21 after nHL-to-eHL correction factors have been applied. The purpose of these frequency- and  
22 mode-specific correction factors is to more closely estimate pure-tone behavioural (dB HL)  
23 thresholds used for diagnostic and hearing aid fitting purposes (see the most current BCEHP

1 clinical protocol for up-to-date correction factors, corresponding stimulus parameters and  
2 recording techniques; Hatton et al., 2022). When AC and BC eHL correction factors are applied,  
3 they come with their own estimation errors (as much as 10-20 dB of error in either direction),  
4 and these errors are additive when calculating the ABG. These estimation errors in combination  
5 with using 10-dB step sizes and/or not testing down to a true threshold make ABG estimations in  
6 clinical practice challenging. The ABR or ASSR ABG can be substantially under- or over-  
7 estimated, and therefore are more appropriately used in a descriptive way to comment on the size  
8 of a conductive component rather than a singular diagnostic criterion. It is important that clinical  
9 protocols recognize these limitations. Clinicians need to keep in mind that unique correction  
10 factors are applied to each individual frequency and differ for AC and BC. When investigating  
11 the diagnostic power of ABG size, this can apply only to a specific frequency and cannot not be  
12 generalized beyond the frequency that is being investigated. Carefully determined correction  
13 factors are necessary and will affect any measure of the ABG. More data are needed for each  
14 frequency with different degrees of CHL. This study continues to support the value of the ABG  
15 as a descriptive tool to *accompany* frequency-specific ABR thresholds and tympanometry  
16 measures in differentiating NH from CHL.

### 17 **Normal Hearing Thresholds and Minimum Intensities**

18 As shown in Tables 5 and 6, across several studies, normal ASSR intensity levels (i.e.,  
19 ASSR threshold level upper limits for those infants with no hearing loss) are approximately 50  
20 and 40 dB HL for 500 and 2000 Hz AC, and approximately 20-30 and 40 dB HL for BC stimuli.  
21 The present study showed minimum intensities of 40 and 40 dB HL for 500 & 2000 Hz AC and  
22 30 & 40 dB HL for 500 & 2000 Hz BC for ASSR. The AC values differ by not more than 10 dB  
23 from the average of the other studies using different stimuli (note variations across studies in the

1 modulation function, or use of one versus multiple simultaneous ASSR stimuli). These  
2 differences may be attributed to differences in sample size, stimuli, whether presentation was  
3 multiple or single, the age range tested, stopping criteria, EEG noise, recording system (and the  
4 system's detection algorithm). The BC minimum intensity at 500 Hz proposed in Small &  
5 Stapells (2008b) of 30 dB HL is consistent with what was found in the present study. The  
6 minimum intensity from this study was slightly higher than 20 dB HL reported by Casey &  
7 Small (2014), however, was likely somewhat overestimated (~5 dB) due to the distribution of the  
8 threshold data and the step size used. The present study and that by Casey & Small (2014) are the  
9 only studies to date that used AM<sup>2</sup> stimuli for BC ASSR, and both studies showed better than the  
10 average of thresholds included in the table. However, ASSR amplitudes are in keeping with these  
11 studies and a study using AM/FM stimuli (Small & Stapells, 2008a). The mechanisms  
12 underlying this difference in thresholds remains an open question. In addition, maturation of the  
13 BC ASSR response makes "cutoff" points less clear for categorizing hearing loss and the use of  
14 an age range of 0-6 months may be too large. Minimum intensities for ABR were in keeping  
15 with those suggested by BCEHP. Importantly, they were not found to be lower. As mentioned  
16 earlier, t-tests comparing NH participants' AC and BC ABR or ASSR thresholds at 500 and 2000  
17 Hz between those with normal and those with abnormal OAE screening results showed no  
18 significant difference; thus, the NH group includes all NH thresholds, regardless of screening  
19 result. Minimum normal intensities for ABR also did not differ between those in the NH group  
20 with a normal vs. abnormal OAE screen; both subgroups had minimum normal intensities of 30  
21 for 2000 Hz AC and BC and 35 and 20 for 500 Hz AC and BC, respectively.

22 <INSERT TABLE 5>

23 <INSERT TABLE 6>

## 1 **Sensitivity and Specificity for Conductive Hearing Loss Detection**

2           As discussed earlier, 500-Hz AC ASSR thresholds are, on average, higher than BC ASSR  
3 thresholds in the CHL group, with a significantly larger ABG compared to the NH group (see  
4 Tables 2 and 3). In the case of mild CHL, however, the ABR does seem better at identifying  
5 modest ABGs in infants than the ASSR, using the parameters incorporated in this study. For this  
6 reason, clinicians should exercise caution when considering using ASSR AC/BC thresholds to  
7 identify mild CHL with small ABGs. Cutoff thresholds where the ASSR ABG demonstrated  
8 high sensitivity lacked high specificity (See Table 4). The sample for the current study did not  
9 include infants with sensorineural hearing loss, and therefore it was not possible to determine the  
10 number of false negatives for BC ASSR. There was significant overlap in the NH and CHL AC  
11 ASSR threshold distributions (and hence the imperfect sensitivity and specificity). We  
12 hypothesize that this overlap may be a reflection of the sampling between groups. Overall, the  
13 CHL group only demonstrated a very mild degree of hearing loss that was isolated to 500 Hz  
14 (and perhaps in some cases may have been resolving). The NH sample recruited was primarily  
15 “at risk” infants who failed or missed their initial hearing screening, and thus some subclinical  
16 degree of middle ear dysfunction may have been present. Perhaps if the CHL group  
17 demonstrated elevated AC thresholds across frequencies or the degree of loss was greater, and  
18 the NH group had instead been recruited from low-risk infants with confirmed normal middle-  
19 ear function, the overlap would have been minimized. Nevertheless, the present study operated  
20 under conditions that are typical in the clinical setting where the separation between these groups  
21 may be less than ideal.

22

23

## **Clinical Implications**

1 Previous studies that compared ASSR thresholds to gold-standard methods of infant  
2 hearing assessment reported strong correlations between the methods and reasonable accuracy in  
3 estimating hearing thresholds. Some studies have suggested that the ASSR can accurately  
4 separate NH infants from those with hearing loss. Differing methodology in this body of research  
5 continues to be problematic. This study is one of only a small number of studies comparing the  
6 ASSR to tone-ABR in infants with NH and with hearing loss, and within these, methodologies  
7 and stimulus choices differ. More work still needs to be done to determine the best methodology  
8 and stimulus parameters for ASSR testing in infants. This study added to the body of research by  
9 providing data using AC and BC ASSR to AM<sup>2</sup> tones at 500 Hz in infants with NH or  
10 conductive hearing loss, but it would be beneficial to provide more data with different degrees of  
11 hearing loss and hearing loss at different frequencies. It is our opinion that the ASSR requires  
12 more research to better understand optimal test parameters for use as a screening or diagnostic  
13 measure for EHDI programs before being clinically implemented. When compared to the ABR  
14 and screening measures, ASSR thresholds underperform in their ability to detect *mild* low  
15 frequency CHL. The ABR is widely used, with well-studied diagnostic criteria and protocols and  
16 it is known that the ABR is accurate in differentiating normal hearing sensitivity from a variety  
17 of degrees of CHL, mixed and sensorineural hearing loss in infants. At this time, the ABR  
18 continues to be the gold standard and is the diagnostic test method that clinicians should continue  
19 to use in their EHDI Programs.

## 20 **Limitations and Future Directions**

21 The study was conducted in the context of a clinical audiology department in Canada,  
22 where it is routine to have one individual making response judgements. This context was perhaps  
23 a limitation of the study. It should be noted that the same individual made threshold estimations



1 for AC and BC ASSRs and ABRs, and hence any subjective bias across response measures  
2 should have been similar for all measures, and hence it is unlikely the choice of a single expert  
3 judge of response presence is a confounding factor in this study.

4         The moderate number of infants included in this study demonstrated a mild degree of  
5 CHL that was only observed at 500 Hz. The conclusions regarding the efficacy of the ASSR in  
6 detecting CHL could differ in a sample with more significant degrees of CHL, hearing loss that  
7 extends beyond 500 Hz, and in cases of more extensive middle ear dysfunction (e.g., congenital  
8 aural atresia, congenital fixation of the ossicular chain, acute otitis media). The results of the  
9 present study suggesting that the ASSR may not be as good an indicator of ABG and CHL (or  
10 middle ear abnormality) as the ABR may be limited to ASSR protocols using multitone AM<sup>2</sup>  
11 stimuli, and only for infants with what appears to be a rather mild conductive loss. Further  
12 studies with more participants and degrees of CHL may help to provide a larger picture of the  
13 efficacy of the ASSR in detection CHL in infants. Of note, acoustic reflexes were not measured  
14 in the initial assessment of infants in either NH or CHL groups. In future studies with a wider  
15 range of hearing loss degrees, the addition of acoustic reflexes may be beneficial to include to  
16 more completely assess in middle ear status. Acoustic reflexes can be problematic, however, in  
17 that they may wake the infant and thus are a lower priority measure in most Canadian ABR  
18 protocols.

19         Monotic multiple (MM) ASSR stimuli (500, 1000, 2000, 4000 Hz) were presented;  
20 however, due to time constraints only 2000 and 500 Hz were able to be measured down to true  
21 threshold and compared with ABR thresholds in this study. The assumption is that if this were to  
22 be used clinically as the only electrophysiologic measure of hearing, the clinician would ideally  
23 assess threshold to all four stimuli to provide a more complete threshold assessment. In previous

1 studies, it has been demonstrated in human subjects that the use of multiple SAM stimuli is more  
2 efficient than a single SAM stimulus (Hatton & Stapells, 2011) and the present study aimed to  
3 investigate a possible alternative to the ABR using a technique that more time efficient than the  
4 single-frequency technique that is used in diagnostic ABR assessments. In this particular  
5 instance, focusing on two frequencies of interest (500 Hz, 2000 Hz) stimuli, while presenting  
6 four AM<sup>2</sup> stimuli may have added some noise to the recordings, and perhaps modestly elevated  
7 ASSR thresholds, but the authors are not aware of any published evidence that MM results in  
8 higher thresholds than MS in human subjects. It should be noted that four SAM<sup>2</sup> stimuli were  
9 used for both AC and BC ASSR stimuli, and hence would not have expected this to substantially  
10 influence the magnitude of the ABG. Future studies aimed to provide clinical evidence of  
11 threshold changes resulting from the use of multiple ASSR stimuli would directly address this  
12 possibility.

13         This study aimed to answer a research question while providing some clinically relevant  
14 information. As such the test protocol was inefficient and if adopted in a routine clinical setting,  
15 would almost certainly have resulted in limited or inadequate information being acquired before  
16 the infant wakes. The key procedural elements that would need to be changed in the clinical  
17 setting include the test strategy of testing down to true threshold for all infants (clearly  
18 unnecessary once it is known that their hearing is ‘Normal’), as well as the use of both the ABR  
19 and ASSR as electrophysiological techniques to assess hearing in the same test session (not ever  
20 required clinically). The BCEHP protocol for clinical use recommends testing down to a  
21 minimum intensity rather than testing down to true threshold in infants with NH (Hatton et al.,  
22 2022). In addition, BCEHP does not include the measurement of ASSR thresholds in their  
23 clinical protocol; ASSR measures were made solely for the purposes of this study. Using only

1 one electrophysiologic measure of hearing thresholds would significantly reduce test time and  
2 would allow for frequency-specific assessment of both ears in a time period that is more  
3 reasonable in a clinical setting. An important additional procedural consideration is that ABR  
4 testing was the priority for the clinical portion of the assessment, always taking place first. This  
5 may have had an impact on the noise of the later-recorded ASSR recordings. It is also  
6 worthwhile to explore test time and protocol efficiency of ASSR where there is a consideration  
7 for implementation in a clinical setting that is unique to the stimulus and recording parameters  
8 and protocols intended to be used (e.g., Cebulla & Stürzebecher, 2015; Sininger et al., 2018,  
9 2020). The difference in starting levels (5-dB offset) between ABR and ASSR may have  
10 influenced the differences in ABG size between the two methods. Once correction factors for  
11 ASSR are confidently established, a different starting level for ASSR may be more appropriate.

12 Finally, due to the properties of the underdeveloped skull, the threshold for BC stimuli at  
13 500 Hz is lower (better) in infants than in adults (e.g., Cone-Wesson & Ramirez, 1997; Small &  
14 Stapells, 2008a). A logical next step is to measure ABG differences in infants after applying  
15 infant-specific correction factors. This study reported ABR and ASSR threshold without the use  
16 of any correction factors as these are not yet available for the ASSR (especially for BC stimuli).  
17 Future research to establish ASSR eHL correction factors may assist in the clinical application of  
18 ASSR thresholds, and act as a spring board for future research involving ASSR ABG in infants  
19 with CHL.

## 20 **Conclusion**

21 EHDI Programs aim to identify hearing loss early in young infants, with many including mild  
22 hearing loss in their target population. Especially outside of North America, there continues to be  
23 the perception that obtaining ABR thresholds to low-frequency tone-bursts are too problematic

1 for clinical use. This is not the experience within Canadian EHDI programs (Bagatto, 2020;  
2 Hatton et al., 2022), nor of the present study. Tone-evoked ABR for low- to high-frequency  
3 stimuli is indeed feasible and can be used to separate mild conductive hearing loss from normal  
4 hearing. In contrast, the ASSR may be more problematic. Compared to the ABR, the variability  
5 of ASSR thresholds and ABG size was too great to reliably separate normal hearing from mild  
6 conductive hearing loss, at least, using the parameters outlined. Furthermore, sensitivity and  
7 specificity for identifying CHL was highest for AC ABR threshold measurement compared to  
8 screening and ASSR threshold measurements. This finding supports continuation of the current  
9 practice using the ABR as the primary tool to assess hearing thresholds in young infants in  
10 Canadian EHDI programs. Before considering the ASSR as a diagnostic tool in this context,  
11 more research is needed using infants with varying degrees of conductive hearing loss at multiple  
12 frequencies to fully assess its appropriateness.

### 13 **References**

- 14  
15 Aimoni, C., Crema, L., Savini, S., Negossi, L., Rosignoli, M., Sacchetto, L., Bianchini, C., &  
16 Ciorba, A. (2018). Hearing threshold estimation by auditory steady state responses (ASSR)  
17 in children. *Acta Otorhinolaryngologica Italica*, 38(4), 361–368.  
18 <https://doi.org/10.14639/0392-100X-1463>
- 19 ANSI. (1996). American national standard specifications for audiometers (ANSI S3.6-1996).  
20 *New York*.
- 21 Bagatto, M. (2020). Protocol for auditory brainstem response-based audiological assessment  
22 (ABRA). *Ontario Infant Hearing Program*.  
23 [https://www.uwo.ca/nca/pdfs/clinical\\_protocols/2018.02\\_ABRA\\_Protocol\\_Oct\\_2020.pdf](https://www.uwo.ca/nca/pdfs/clinical_protocols/2018.02_ABRA_Protocol_Oct_2020.pdf)
- 24 Casey, K.-A., & Small, S. A. (2014). Comparisons of auditory steady state response and

- 1 behavioural air conduction and bone conduction thresholds for infants and adults with  
2 normal hearing. *Ear and Hearing*, 35(4), 423-439.  
3 <https://doi.org/10.1097/AUD.0000000000000021>
- 4 Cebulla, M., & Stürzebecher, E. (2015). Automated auditory response detection: Further  
5 improvement of the statistical test strategy by using progressive test steps of iteration.  
6 *International Journal of Audiology*, 54(8), 568–572.  
7 <https://doi.org/10.3109/14992027.2015.1017659>
- 8 Cone-Wesson, B., Parker, J., Swiderski, N., & Rickards, F. (2002). The auditory steady-state  
9 response: Full-term and premature neonates. *Journal of the American Academy of*  
10 *Audiology*, 13(5), 260–269.  
11 <https://doi.org/10.1055/s-0040-1715969>
- 12 Cone-Wesson, B., & Ramirez, G. M. (1997). Hearing sensitivity in newborns estimated from  
13 ABRs to bone-conducted sounds. *Journal of the American Academy of Audiology*, 8(5),  
14 299–307.
- 15 Hall, J. W. (2016). Crosscheck principle in pediatric audiology today: A 40-year perspective.  
16 *Journal of Audiology and Otology*, 20(2), 59–67. <https://doi.org/10.7874/jao.2016.20.2.59>
- 17 Hatton, J.L., Van Maanen, A., & Stapells, D. R. (2022). *British Columbia Early Earing*  
18 *Program: auditory brainstem response (ABR) protocol*. [http://www.phsa.ca/bc-early-](http://www.phsa.ca/bc-early-hearing/Documents/ABR_Protocol.pdf)  
19 [hearing/Documents/ABR\\_Protocol.pdf](http://www.phsa.ca/bc-early-hearing/Documents/ABR_Protocol.pdf)
- 20 Hatton, J. L., Janssen, R. M., & Stapells, D. R. (2012). Auditory brainstem responses to bone-  
21 conducted brief tones in young children with conductive or sensorineural hearing loss.  
22 *International Journal of Otolaryngology*, 2012. <https://doi.org/10.1155/2012/284864>
- 23 Hatton, J. L., Rowlandson, J., Beers, A., & Small, S.A. (2019). Telehealth-enabled auditory

- 1       brainstem response testing for infants living in rural communities: the British Columbia  
2       Early Hearing Program experience. *International Journal of Audiology*, 58(7), 381–392.  
3       <https://doi.org/10.1080/14992027.2019.1584681>
- 4       Hatton, J. L., & Stapells, D. R. (2011). The efficiency of the single- versus multiple-stimulus  
5       auditory steady state responses in infants. *Ear and Hearing*, 32(3), 349–357.  
6       <https://doi.org/10.1097/AUD.0b013e3181ff352c>
- 7       Janssen, R. M., Usher, L., & Stapells, D. R. (2010). The British Columbia’s Children’s Hospital  
8       tone-evoked auditory brainstem response protocol: How long do infants sleep and how  
9       much information can be obtained in one appointment? *Ear and Hearing*, 31(5), 722–724.  
10       <https://doi.org/10.1097/AUD.0b013e3181ddf5c0>
- 11       JCIH. (2019). Year 2019 position statement: Principles and guidelines for early hearing detection  
12       and intervention programs. *The Journal of Early Hearing Detection and Intervention*, 4(2),  
13       1–44.
- 14       Jerger, J. (1970). Clinical experience with impedance audiometry. *Archives of Otolaryngology*,  
15       92, 311–324.
- 16       John, M. S., Brown, D. K., Muir, P. J., & Picton, T. W. (2004). Recording auditory steady-state  
17       responses in young infants. *Ear and Hearing*, 25(6), 539–553.  
18       <https://doi.org/10.1097/01.AUD.0000148050.80749.AC>
- 19       John, M. S., & Picton, T. W. (2000). Human auditory steady-state responses to amplitude-  
20       modulated tones: Phase and latency measurements. *Hearing Research*, 141(1–2), 57–79.  
21       [https://doi.org/10.1016/S0378-5955\(99\)00209-9](https://doi.org/10.1016/S0378-5955(99)00209-9)
- 22       Gorga, M. P., Johnson, T. A., Kaminski, J. R., Beauchaine, K. L., Garner, C. A., & Neely, S. T.  
23       (2006). Using a combination of click- and tone burst-evoked auditory brain stem response

- 1        measurements to estimate pure-tone thresholds. *Ear and Hearing*, 27(1), 60–74.  
2        <https://doi.org/10.1097/01.aud.0000194511.14740.9c>
- 3    Lins, O. G., Picton, T. W., Boucher, B. L., Durieux-Smith, A., Champagne, S. C., Moran, L. M.,  
4        Perez-Abalo, M. C., Martin, V., & Savio, G. (1996). Frequency-specific audiometry using  
5        steady-state responses. *Ear and Hearing*, 17(2), 81–96. [https://doi.org/10.1097/00003446-](https://doi.org/10.1097/00003446-199604000-00001)  
6        [199604000-00001](https://doi.org/10.1097/00003446-199604000-00001)
- 7    Luts, H., Desloovere, C., & Wouters, J. (2006). Clinical application of dichotic multiple-stimulus  
8        auditory steady-state responses in high-risk newborns and young children. *Audiology &*  
9        *Neurotology*, 11(1), 24–37. <https://doi.org/10.1159/000088852>
- 10   Michel, F., & Jørgensen, K. F. (2017). Comparison of threshold estimation in infants with  
11        hearing loss or normal hearing using auditory steady-state response evoked by narrow band  
12        CE-chirps and auditory brainstem response evoked by tone pips. *International Journal of*  
13        *Audiology*, 56(2), 99–105. <https://doi.org/10.1080/14992027.2016.1234719>
- 14   Nagashima, H., Udaka, J., Chida, I., Shimada, A., Kondo, E., & Takeda, N. (2013). Air-bone gap  
15        estimated with multiple auditory steady-state response in young children with otitis media  
16        with effusion. *Auris Nasus Larynx*, 40(6), 534–538.  
17        <https://doi.org/10.1016/j.anl.2013.03.002>
- 18   Rance, G., & Rickards, F. (2002). Prediction of hearing threshold in infants using auditory  
19        steady-state evoked potentials. *Journal of the American Academy of Audiology*, 13(5), 236–  
20        245). <https://doi.org/10.1055/s-0040-1715967>
- 21   Rance, G., Roper, R., Symons, L., Moody, L.-J., Poulis, C., Dourlay, M., & Kelly, T. (2005).  
22        Hearing threshold estimation in infants using auditory steady-state responses. *Journal of the*  
23        *American Academy of Audiology*, 16(5), 291–300. <https://doi.org/10.3766/jaaa.16.5.4>

- 1 Rance, G., Tomlin, D., & Rickards, F. W. (2006). Comparison of auditory steady-state responses  
2 and tone-burst auditory brainstem responses in normal babies. *Ear and Hearing*, 27(6),  
3 751–762. <https://doi.org/10.1097/01.aud.0000240491.68218.ed>
- 4 Rodrigues, G. R. I., & Lewis, D. R. (2014). Establishing auditory steady-state response  
5 thresholds to narrow band CE-chirps® in full-term neonates. *International Journal of*  
6 *Pediatric Otorhinolaryngology*, 78(2), 238–243.  
7 <https://doi.org/10.1016/j.ijporl.2013.11.012>
- 8 Rodrigues, G. R. I., Lewis, D. R., & Fichino, S. N. (2010). Steady-state auditory evoked  
9 responses in audiological diagnosis in children: A comparison with brainstem evoked  
10 auditory responses. *Brazilian Journal of Otorhinolaryngology*, 76(1), 96–101.  
11 <https://doi.org/10.1590/s1808-86942010000100016>
- 12 Sininger, Y. S., Hunter, L. L., Hayes, D., Roush, P. A., & Uhler, K. M. (2018). Evaluation of  
13 speed and accuracy of next-generation auditory steady state response and auditory  
14 brainstem response audiometry in children with normal hearing and hearing loss. *Ear and*  
15 *Hearing*, 39(6), 1207–1223. <https://doi.org/10.1097/AUD.0000000000000580>
- 16 Sininger, Y. S., Hunter, L. L., Roush, P. A., Windmill, S., Hayes, D., & Uhler, K. M. (2020).  
17 Protocol for rapid, accurate, electrophysiologic, auditory assessment of infants and toddlers.  
18 *Journal of the American Academy of Audiology*, 31(6), 455–468.  
19 <https://doi.org/10.3766/jaaa.19046>
- 20 Small, S. A., Hatton, J. L., & Stapells, D. R. (2007). Effects of bone oscillator coupling method,  
21 placement location, and occlusion on bone-conduction auditory steady-state responses in  
22 infants. *Ear and Hearing*, 28(1), 83–98.  
23 <https://doi.org/10.1097/01.aud.0000249787.97957.5b>



- 1 Small, S. A., & Stapells, D. R. (2008a). Maturation of bone conduction multiple auditory steady-  
2 state responses. *International Journal of Audiology*, 47(8), 476–488.  
3 <https://doi.org/10.1080/14992020802055284>
- 4 Small, S. A., & Stapells, D. R. (2008b). Normal ipsilateral/contralateral asymmetries in infant  
5 multiple auditory steady-state responses to air- and bone-conduction stimuli. *Ear and*  
6 *Hearing*, 29(2), 185–198. <https://doi.org/10.1097/01.aud.0000305157.83012.f4>
- 7 Stapells, D.R., & Small, S. A. (2017). Threshold assessment in infants using the frequency-  
8 specific auditory brainstem response and auditory steady-state response. In Tharpe, A.M., &  
9 Seewald, R.C. (Eds.), *Comprehensive Handbook of Pediatric Audiology*. (Second Edition),  
10 505–550. Plural Publishing, Inc.
- 11 Stapells, D. R., & Ruben, R. J. (1989). Auditory brain stem responses to bone-conducted tones in  
12 infants. *Annals of Otology, Rhinology & Laryngology*, 98(12), 941–949.  
13 <https://doi.org/10.1177/000348948909801205>
- 14 Swanepoel, D. W., Ebrahim, S., Friedland, P., Swanepoel, A., & Pottas, L. (2008). Auditory  
15 steady-state responses to bone conduction stimuli in children with hearing loss.  
16 *International Journal of Pediatric Otorhinolaryngology*, 72(12), 1861–1871.  
17 <https://doi.org/10.1016/j.ijporl.2008.09.017>
- 18 Swanepoel, D. W., & Steyn, K. (2005). Short report: establishing normal hearing for infants with  
19 the auditory steady-state response. *The South African Journal of Communication*  
20 *Disorders*, 52, 36–39.
- 21 Van Maanen, A., & Stapells, D. R. (2009). Normal multiple auditory steady-state response  
22 thresholds to air-conducted stimuli in infants. *Journal of the American Academy of*  
23 *Audiology*, 20(3), 196–207). <https://doi.org/10.3766/jaaa.20.3.6>

- 1 Van Maanen, A., & Stapells, D. R. (2010). Multiple-ASSR thresholds in infants and young  
2 children with hearing loss. *Journal of the American Academy of Audiology*, 21(8), 535–  
3 545). <https://doi.org/10.3766/jaaa.21.8.5>
- 4 Widen, J. E., White, K. R., Gravel, J. S., Vohr, B. R., James, M., Kennalley, T., Maxon, A. B.,  
5 Spivak, L., Sullivan-Mahoney, M., Weirather, Y., & Meyer, S. (2005). A Multisite Study to  
6 Examine the Efficacy of the Otoacoustic Emission/Automated Auditory Brainstem  
7 Response Newborn Hearing Screening Protocol: Results of Visual Reinforcement  
8 Audiometry Judith. *American Academy of Audiology*, 14, S2000–S2216.
- 9 Yang, E. Y., Rupert, A. L., & Moushegian, G. (1987). A developmental study of bone  
10 conduction auditory brain stem response in infants. *Ear and Hearing*, 8(4), 244–251.  
11 <https://doi.org/10.1097/00003446-198708000-00009>
- 12 Yang, E. Y., Stuart, A., Stenstrom, R., & Green, W. B. (1993). Test-retest variability of the  
13 auditory brainstem response to bone-conducted clicks in newborn infants. *International*  
14 *Journal of Audiology*, 32(2), 89–94. <https://doi.org/10.3109/00206099309071859>
- 15 Yang, E. Y., Stuart, A., Stenstrom, R., & Hollett, S. (1991). Effect of vibrator to head coupling  
16 force on the auditory brain stem response to bone conducted clicks in newborn infants. *Ear*  
17 *and Hearing*, 12(1), 55–60. <https://doi.org/10.1097/00003446-199102000-00007>

**Figure 1.**

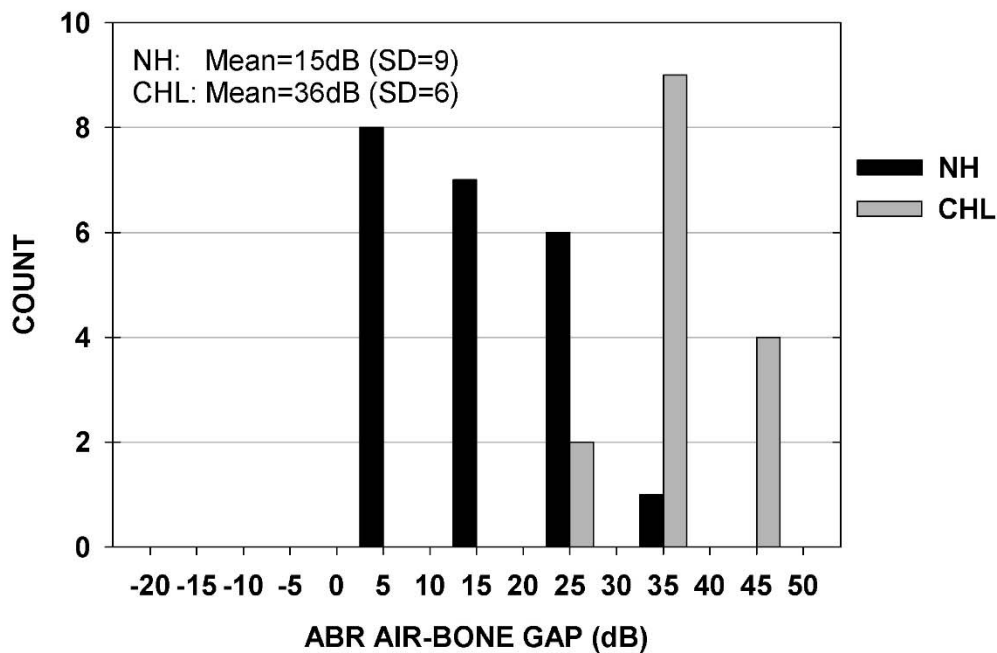

SD = Standard Deviation.

**Figure 2.**

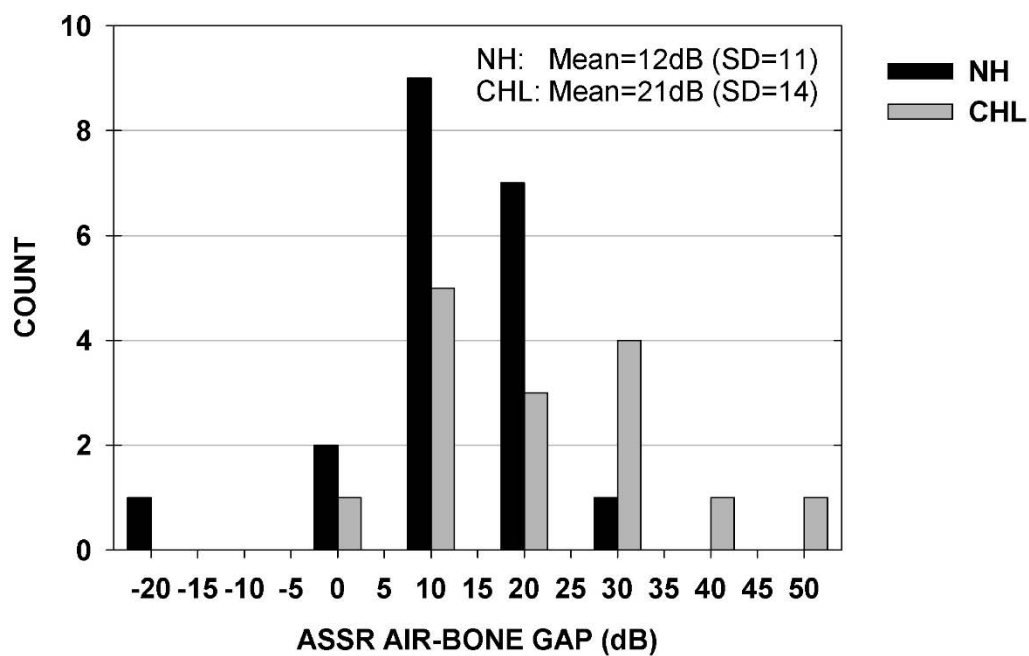

SD = Standard Deviation.

**Figure 1.** *Auditory brainstem response (ABR) air-bone gaps (ABG) in normal hearing (NH) and conductive hearing loss (CHL) groups.*

**Figure 2.** *Auditory steady-state response (ASSR) air-bone gaps (ABG) in normal hearing (NH) and conductive hearing loss (CHL) groups*

**Table 1**

*Sensitivity and Specificity Calculation Method*

|             | CHL on ABR         | NH on ABR          |
|-------------|--------------------|--------------------|
| CHL on ASSR | A = True positive  | B = False positive |
| NH on ASSR  | C = False negative | D = True negative  |

*Note.* Sensitivity =  $A/(A+C) \times 100$ , Specificity =  $D/(D+B) \times 100$ . ASSR = Auditory Steady-State Response, ABR = Auditory Brainstem Response, NH = Normal Hearing, CHL = Conductive Hearing Loss.

**Table 2**

*AC and BC 2000 and 500 Hz ASSR and ABR mean thresholds for NH and CHL groups*

|    |           | NH Group           |                 |                 |                 | CHL Group       |                 |
|----|-----------|--------------------|-----------------|-----------------|-----------------|-----------------|-----------------|
|    |           | 2000 Hz            |                 | 500 Hz          |                 | 500 Hz          |                 |
|    |           | ASSR<br>(dB<br>HL) | ABR<br>(dB nHL) | ASSR<br>(dB HL) | ABR<br>(dB nHL) | ASSR<br>(dB HL) | ABR<br>(dB nHL) |
| AC | Mean      | 20.47              | 17.72           | 29.52           | 25.43           | 36.67           | 48.33           |
|    | SD        | 12.03              | 9.22            | 9.20            | 7.05            | 11.12           | 4.88            |
|    | n         | 21                 | 22              | 21              | 23              | 15              | 15              |
|    | 90% Level | 40                 | 30              | 40              | 35              |                 |                 |
| BC | Mean      | 21.00              | 15.00           | 17.39           | 10.41           | 15.33           | 12.00           |
|    | SD        | 13.96              | 10.12           | 9.63            | 7.50            | 12.63           | 7.93            |
|    | n         | 21                 | 22              | 23              | 24              | 15              | 15              |
|    | 90% Level | 40                 | 30              | 30              | 20              | 40              | 20              |

*Note.* AC = Air-Conduction, BC = Bone-Conduction, ASSR = Auditory Steady-State Response, ABR = Auditory Brainstem Response, NH = Normal Hearing, CHL = Conductive Hearing Loss, SD = Standard Deviation, n = number of participants, 90% Level = lowest level (in dB HL or nHL) at which at least 90% of group shows response present.

**Table 3**

*2000 and 500 Hz ASSR and ABR mean ABG size for NH and CHL groups*

|      | NH Group            |                    |                     |                    | CHL Group           |                    |
|------|---------------------|--------------------|---------------------|--------------------|---------------------|--------------------|
|      | 2000 Hz             |                    | 500 Hz              |                    | 500 Hz              |                    |
|      | ASSR<br>ABG<br>(dB) | ABR<br>ABG<br>(dB) | ASSR<br>ABG<br>(dB) | ABR<br>ABG<br>(dB) | ASSR<br>ABG<br>(dB) | ABR<br>ABG<br>(dB) |
| Mean | -3.33               | 2.73               | 12.00               | 15.00              | 21.33               | 36.33              |
| SD   | 15.92               | 12.41              | 10.56               | 9.26               | 13.56               | 6.40               |
| n    | 21                  | 22                 | 20                  | 22                 | 15                  | 15                 |

*Note.* ASSR = Auditory Steady-State Response, ABR = Auditory Brainstem Response, ABG = Air-Bone Gap, NH = Normal Hearing, CHL = Conductive Hearing Loss, SD = Standard Deviation, n = number of participants.



**Table 4**

*Sensitivity and Specificity of CHL detection compared to gold standard ABR by test type*

|                         | Test             | Sensitivity | Specificity |
|-------------------------|------------------|-------------|-------------|
| Screening               | Tymp + OAE       | 100*        | 44          |
|                         | OAE only         | 100*        | 58          |
|                         | <b>Tymp only</b> | <b>100*</b> | <b>60</b>   |
| ASSR ABG size (dB)      | <b>≥ 10</b>      | <b>93</b>   | <b>15</b>   |
|                         | ≥ 20             | 60          | 60          |
|                         | ≥ 30             | 40          | 95          |
|                         | ≥ 40             | 13          | 100         |
| ABR ABG size (dB)       | ≥ 5              | 100         | 0           |
|                         | ≥ 15             | 100         | 36          |
|                         | <b>≥ 25</b>      | <b>100</b>  | <b>68</b>   |
|                         | ≥ 35             | 87          | 95          |
|                         | ≥ 45             | 26          | 100         |
| ASSR thresholds (dB HL) | <b>AC ≥ 20</b>   | <b>100</b>  | <b>5</b>    |
|                         | AC ≥ 30          | 87          | 33          |
|                         | AC ≥ 40          | 47          | 67          |
|                         | AC ≥ 50          | 33          | 100         |

*Note.* \*Sensitivity of 100% due to classification criteria for CHL that required “refer” results on both tympanometry and OAE screening. CHL = Conductive Hearing Loss, ABR = Auditory Brainstem Response, ASSR = Auditory Steady State Response, Tymp = Tympanometry, OAE = Otoacoustic Emissions, ABG = Air-Bone Gap, AC = Air-Conduction.

**Table 5**

*A summary of 500 & 2000 Hz AC ASSR “normal levels” in young children in literature*

|                                     | Modulation                       | Multiple (M)<br>/Single (S) | Age        | Norm Max (dB HL) |         |
|-------------------------------------|----------------------------------|-----------------------------|------------|------------------|---------|
|                                     |                                  |                             |            | 500 Hz           | 2000 Hz |
| Lins et al., (1996) **              | AM                               | M                           | 1-10 mos   | 48               | 38      |
| Cone-Wesson, Parker, et al., (2002) | AM                               | S                           | <4 mos     | >71              | 50      |
| John, Brown et al., (2004)          | MM, AM, AM <sup>2</sup>          | M                           | 3-15 wks   | >46              | >50     |
| Rance et al., (2005)                | MM                               | S                           | 1-3 mos    | 52               | 40      |
| Swanepoel & Steyn (2005)            | MM                               | M                           | 3-8 wks    | 50               | >50     |
| Luts et al., (2006) **              | MM                               | M                           | <3 mos     | >44              | 42      |
| Rance & Tomlin (2006)               | MM                               | S                           | 6 wks      | 50               |         |
| Van Maanen & Stapells (2009)        | AM (cos <sup>3</sup> sinusoids*) | M                           | <6 mos     | 49               | 36      |
| Casey & Small (2014)                | AM <sup>2</sup>                  | M                           | 6.5-19 mos | 30               |         |
| Rodrigues & Lewis (2014) **         | NBchirps                         | M                           | 2 days     | 59               | 31      |
| Present Study                       | AM <sup>2</sup>                  | M                           | 0-6 mos    | 40               | 40      |

*Note.* \*Cosine3-windowed sinusoids are nearly equivalent to AM<sup>2</sup>. \*\* Thresholds were converted from dB SPL to dB HL using ANSI-1996 adjustment values. \*\*\*Levels provided are in dB HL, converted levels from NB chirp « nHL » using Haughton 2-cc coupler conversions. AC = Air-Conduction, ASSR = Auditory-Steady State Response, AM = Amplitude Modulation, MM = Mixed Modulation, NB = Narrowband, Mos = Months, Wks = Weeks.

**Table 6**

*A summary of 500 & 2000 Hz BC ASSR “normal levels” in young children in literature*

|                         | Modulation      | Multiple (M) /Single (S) | Age        | Norm Max (dB HL) |         |
|-------------------------|-----------------|--------------------------|------------|------------------|---------|
|                         |                 |                          |            | 500 Hz           | 2000 Hz |
| Small & Stapells (2008) | MM              | M                        | 0-11 mos   | 30               | 40      |
|                         |                 |                          | 12-24 mos  | 40               | 40      |
| Small & Stapells (2008) | MM              | M                        | 2-11 mos   | 30               | 30      |
| Casey & Small (2014)    | AM <sup>2</sup> | M                        | 6.5-19 mos | 30               | 40      |
| Present Study           | AM <sup>2</sup> | M                        | 0-6 mos    | 30               | 40      |

*Note.* BC = Bone-Conduction, ASSR = Auditory Steady-State Response, MM = Mixed Modulation, AM = Amplitude Modulation, Mos = Months.
